# Supplementary material for: One year results of a randomized controlled clinical study evaluating the effects of non-surgical periodontal therapy of chronic periodontitis in conjunction with three or seven days systemic administration of amoxicillin/metronidazole
Source: PubMed Central journal article supplement (PMC5491014; doi:10.1371/journal.pone.0179592), 2017-06-29
Supplement: pone.0179592.s004.pdf [file pone.0179592.s004.pdf]

**Protocolul studiului pentru depunerea la Comisia Etică a UMF „Iuliu Hatieganu“  
Cluj-Napoca  
09.01.2012**

Titlul studiului:

**Tratamentul parodontal nechirurgical cu administrare de Amoxicilina și Metronidazol pentru doua perioade de administrare diferită la pacientii cu parodontita cronică severă**

Centre participante la studiu:

Clinica de parodontologie  
Universitatea Berna, Elvetia  
Director: Prof. Dr. med. Dent. Anton Sculean, Dr. h.c., M.S.  
PD Dr. med dent. Sigrun Eick  
Freiburgstr. 7, 3010 Berna, Elvetia

Clinica de protetica Dentara  
Universitatea de Medicina si Farmacie “Iuliu Hatieganu”, Cluj-Napoca  
Coordonator studiu: Sef lucrari Dr. Raluca Cosgarea  
Str. Clinicilor Nr. 32, Cluj-Napoca  
E-Mail: [raluca.cosgarea@umfcluj.ro](mailto:raluca.cosgarea@umfcluj.ro)  
Tel: 0751-638904

Timp estimat pentru desfasurarea studiului:

2012-2014

## Introducere

Parodontita reprezintă o boală inflamatorie inițiată de biofilmul bacterian și care afectează țesuturile ce înconjoară dinții; boala implică resorbție osoasă progresivă care, dacă rămâne netratată poate să ducă la pierderea dinților. Tratamentul parodontal implică îndepărtarea filmului bacterian de pe structura dintelui prin curățare mecanică ("scaling and root planing", SRP). În schimb, a fost demonstrat că SRP nu este destul de eficient în pungi parodontale (PPT) mai adânci de 5 mm [Badersten et al. 1987, Caffesse et al. 1986]. De aceea tratamentul parodontal este realizat într-o etapă nechirurgicală și una chirurgicală corectivă [Heitz-Mayfield et al. 2002, van der Weijden et al. 2002].

Bacteriile parodontopatogene nu pot fi eliminate complet prin SRP. Multe studii au demonstrat persistența unor bacterii parodontopatogene (agregatibacter actinomycescomitans, porphyromonas gingivalis, e.t.c.) după terapia mecanică și progresia distrucției parodontale în aceste situații [Mombelli et al. 1994, Mombelli et al. 2000, Renvert et al. 1990].

Datorită acestor limitări, surfasajul mecanic radicular a fost completat de folosirea adjuvantă a antibioticelor. O scară largă de antibiotice au fost investigate în scopul folosirii ca și terapie adjuvantă la SRP: amoxicilina cu și fără acid clavulanic, metronidazol, clindamicina, doxiciclina, azitromicina, moxifloxacină, tetraciclină, spiramicina și diferite combinații ale acestora [Slots et al. 2004, Guentsch et al. 2008, Griffiths et al. 2011, Flemmig et al. 2011, Herrera et al. 2008, Heitz-Mayfield et al. 2009]. Una dintre combinațiile cele mai des investigate a fost amoxicilina (AMX) și metronidazolul (MET). Această combinație reduce cantitatea bacteriilor parodontopatogene din regiunile afectate parodontal și duce la rezultate clinice pozitive din punctul de vedere al reducerii pungilor parodontale (PD) și al obținerii de atașament gingival (CAL) [van Winkelhoff et al. 1991, Winkel et al. 2001, Rooney et al. 2002, Matarazzo et al. 2008, Lopez et al. 1998, Guerrero et al. 2005].

Dozarea și perioada de administrare a antibioticelor descrise în literatura variază: 375 mg AMX și 250/500 mg MET 3x1/zi pentru 7-8 zile [Cionca et al. 2010, 2009, Flemmig et al. 1998, Mombelli et al. 2005, Ehmke et al. 2005, Ribeiro et al. 2009]; alte studii au descris administrarea dozei de 500 mg AMX și MET 3x1/zi pentru 7 [Yek et al. 2010, Griffiths et al. 2011, Guerrero et al. 2005], sau a 500 mg AMX și 400/250 mg MET 3x1/zi pentru 10-14 zile [Heller et al. 2011, Silva et al. 2011, Matarazzo et al. 2008, Mestnik et al. 2010, Rodriguez et al. 2011]. Oricare ar fi doza și durata de administrare, este important ca acestea să fie administrate în cantități suficiente.

## **Scopul studiului:**

Scopul prezentului studiu este de a evalua rezultatele clinice, microbiologice si imunologice obtinute după tratamentul parodontal nechirurgical in combinatie cu administrarea de amoxicilina (AMX) si metronidazol (MET) pe doua perioade diferite la pacienții cu parodontită cronică severă.

## **Obiective:**

### *Primare:*

- evaluarea schimbărilor nivelului de atasament gingival (CAL) după tratamentul parodontal nechirurgical (SRP in 24 h) in combinatie cu administrarea de amoxicilina (AMX) si metronidazol (MET) pe două perioade diferite la pacienți cu parodontită cronică severă la 3, 6 si 12 luni.

### *Secundare:*

- Evaluarea schimbărilor la nivelul PPD si a sângerării la sondare (BOP)
- evaluarea calitativă si cantitativă a efectului asupra florei bacteriene subgingivale
- determinarea efectului asupra citochinelor din fluidul intracrevicular (IL-1 $\beta$ , IL-10, IL-8, MMP-8)
- morbiditatea postoperativă și rezultatele din punctului de vedere al pacientului
- reactii adverse

## **Pacienți:**

102 pacienți cu parodontita cronică severă (Cel puțin o PPD de 6 mm in fiecare cadran) vor fi recrutati la Clinica de Protetica a UMF Cluj-Napoca

## **Criterii de includere:**

- virsta minima de 18 ani
- $\geq 12$  dinți natural existenți
- semne clinice si radiografice a unei forme severe de parodontita cronica (PPD $\geq 6$  mm)

- nivel bun de igienă orală (indice de placă <25%)
- anamneză să fie pacienți sănătoși: fără boli de hipocoagulabilitate, diabet tip I sau II instabil, post iradiere în zona cap gât, care să necesite profilaxie antibiotică, boli infecțioase sau boli cardiace care necesită profilaxie antibiotică înainte a tratamentelor dentare, sau medicație cu efect asupra gingiei, afecțiuni hepatice
- consimțământul informat al pacientului

### **Criterii de excludere:**

- tratament parodontal nechirurgical în ultimele 12 luni
- administrare topică sau sistemică de antibiotic în ultimele 3 luni
- medicație care poate interacționa cu AMX sau MET (derivate de cumarină, care conțin derivați alcoolici, 5-fluoruracil, disulfiram, emprenavir, lopinavir, ritonavir)
- medicație cu efect asupra parodontiului: ciclosporina A, fenitoina, blocanți de canal de calciu (Nifedipină, Verapamil, Amlodipină, Diltiazem).
- paciente însărcinate sau aflate în perioada de lactație
- pacienți care nu îndeplinesc criteriile de includere

### **Tipul studiului:**

studiu clinic prospectiv, randomizat, controlat

### **Protocolul studiului:**

Examinarea clinică va fi realizată de un investigator calibrat și blindat la tipul de tratament. Următorii parametri se vor determina la bază (înainte de SRP), la 3, 6 și 12 luni după terapie:

- anamneza
- Anamneza de fumător
- statusul dentar și parodontal (PPD; CAL, furcații, mobilitate)
- sângerarea și suprațea la sondare (BOP și SUP)

- Indicele de placa dentară și inflamație gingivală (O'Leary 1972, Ainamo & Bay 1975)
- radiografie panoramica inaintea tratamentului
- radiografii retroalveolare de la dinții test
- probe microbiologice si imunologice obținute de la punga parodontala cea mai adâncă a fiecărei hemiarcade și de la fiecare dinte test; Prin metoda real-time PCR se vor determina bacteriile parodontopatogene *Aggregatibacter actinomycetemcomitans*, *Porphyromonas gingivalis*, *Tannerella forsythia* si *Treponema denticola*. Prin testul ELISA se determina citochinele IL-1 $\beta$ , IL-10, IL-8, MMP-8.

#### *Tratamentul parodontal:*

Conform unei liste de randomizare, pacienții vor fi împărțiți in trei grupuri: grup martor si grup test1 si test 2. Împărțirea pacienților în cele trei grupuri va fi realizată conform unei liste de randomizare generata computerizat. Pentru toate grupurile se va efectua sub anestezie locala detartrajul si surfasajul radicular subgingival (SRP) in 24 de ore. Conform listei de randomizare pacienții vor primi urmatarea medicatie:

Grupul test 1: 500 mg AMX (3 x 1/zi) si 500 mg MET (3 x 1 /zi) pentru 7 zile

Grupul test 2: 500 mg AMX (3 x 1/zi) si 500 mg MET (3 x 1 /zi) pentru 3 zile

Grupul martor: fara antibiotic

Pacienții vor fi chemați la control la 2 săptămâni, cand se vor lua primele probe imunologice din fluidul intracrevicular. Urmatoarele controale vor fi la 3, 6 si 12 luni.

#### **Statistică:**

Analiza statistică va fi realizată folosind un program computerizat SPSS pentru Windows. Valorile medii si devierile standard vor fi calculate pentru fiecare variabila clinica. De asemenea medianul va fi determinat. Teste neparametrice vor fi folosite.

Datele pacienților vor fi documentate pe formulare speciale, depozitate în siguranța de coordonatorul studiului.

Aspecte etice:

Studiul va fi realizat în conformitate cu prevederile Declarației de la Helsinki 1975, revizuita în 2000.

Toți participanții vor semna consimțământul informat al pacientului înainte de începerea studiului.

Recrutarea pacienților nu va fi începută înainte de votul pozitiv al comisiei de etica a UMF Cluj-Napoca.

Cluj-Napoca 21.11.2011

Șef lucr. Dr. Raluca Cosgarea

## Literatură

1. Ainamo, J., Bay, I. (1975) Problems and proposals for recording gingivitis and plaque. *Int Dent J* 25, 229-235.
2. Badersten A, Nilve'us R, Egelberg J. Effect of nonsurgical periodontal therapy (VIII). Probing attachment changes related to clinical characteristics. *J ClinPeriodontol* 1987; 14: 425–432.
3. Caffesse RG, Sweeney PL, Smith BA. Scaling and root planing with and without periodontal flap surgery. *J ClinPeriodontol* 1986: 13: 205–210.
4. Cionca N, Giannopoulou C, Ugolotti G, Mombelli A. Amoxicillin and metronidazole as an adjunct to full-mouth scaling and root planing of chronic periodontitis. *J Periodontol* 2009: 80: 364–371.
5. Cionca N, Giannopoulou C, Ugolotti G, Mombelli A. Microbiological testing and outcomes of full-mouth scaling and root planing with or without amoxicillin / metronidazole in chronic periodontitis. *J Periodontol* 2010: 81: 15–23.
6. Dahlen G, Wikström M, Renvert S. Treatment of periodontal disease based on microbiological diagnosis. A 5-year follow-up on individual patterns. *J Periodontol* 1996: 67: 879–887.
7. Ehmke, B., Moter, A., Beikler, T., Milian, E. & Flemmig, T. F. Adjunctive antimicrobial therapy of periodontitis: long-term effects on disease progression and oral colonization. *Journal of Periodontology* 2005: 76, 749–759.
8. Engebretson, S. P., Grbic, J. T., Singer, R. & Lamster, I. B. GCF IL-1beta profiles in periodontal disease. *Journal of Clinical Periodontology* 2002: 29, 48–53.
9. Flemmig TF, Petersilka G, Völp A, Gravemeier M, Yillz M, Mross D, Prior K, Zamamoto J, Beikler T. Efficacy and safety of adjunctive local moxifloxacin delivery in the treatment of periodontitis. *JPeriodontol* 2011: 82: 96-105.
10. Goutoudi, P., Diza, E. & Arvanitidou, M. Effect of periodontal therapy on crevicular fluid interleukin-1beta and interleukin-10 levels in chronic periodontitis. *Journal of Dentistry* 2004: 32, 511–520.
11. Griffiths GS, Ayob R, Guerrero A, Nibali L, Suvan J, Moles DR, Tonetti MS. Amoxicillin and metronidazole as an adjunctive treatment in generalized aggressive periodontitis at initial therapy or re-treatment: a randomized controlled clinical trial. *J ClinPeriodontol* 2011: 38: 43-49.

12. Grossi SG, Zambon JJ, Ho AW, Koch G, Dunford RG, Machtei EE, Norderyd OM, Genco RJ. Assessment of risk for periodontal disease. I. Risk indicators for attachment loss. *J Periodontol* 1994; 65: 260–267.
13. Guentsch A, Jentsch H, Pfister W, Hoffmann T, Eick S. Moxifloxacin as an adjunctive antibiotic in the treatment of severe chronic periodontitis. *J Periodontol*. 2008; 79:1894-903.
14. Guerrero A, Griffiths GS, Nibali L, Suvan J, Moles DR, Laurell L, Tonetti MS. Adjunctive benefits of systemic amoxicillin and metronidazole in non-surgical treatment of generalized aggressive periodontitis: a randomized placebo-controlled clinical trial. *J Clin Periodontol* 2005; 32: 1096–1107.
15. Haffajee AD, Socransky SS. Microbial etiological agents of destructive periodontal diseases. *Periodontol* 2000 1994; 5: 78–111.
16. Hamp, S.E., Nymann, S., Lindhe, J. Periodontal treatment of multirrooted teeth. Results after 5 years. *J Clin Periodontol* 1975; 2, 126-135.
17. Heitz-Mayfield LJ, Trombelli L, Heitz F, Needleman I, Moles D. A systematic review of the effect of surgical debridement vs non-surgical debridement for the treatment of chronic periodontitis. *J Clin Periodontol* 2002; 29(Suppl. 3): 92–102.
18. Heitz-Mayfield LJ. Systemic antibiotics in periodontal therapy. *Austr Dent J* 2009; 54 (Suppl 1): S96-S101.
19. Heller D, Varela VM, e Silva-Senem MX, Torres MCB, Feres-Filho EJ, Colombo APV: Impact of systemic antimicrobials combined to anti-infective mechanical debridement on the microbiota of generalized aggressive periodontitis: a 6-month RCT. *J Clin Periodontol* 2011; 38: 355-364.
20. Herrera D, Alonso B, Leon R, Roldan S, Sanz M. Antimicrobial therapy in periodontitis: the use of systemic antimicrobials against the subgingival biofilm. *J Clin Periodontol* 2008; 35 (Suppl 8): 45-66.
21. Lopez N, Gamonal J. Effects of metronidazole plus amoxicillin in progressive untreated adult periodontitis: results of a single one-week course after 2 and 4 months. *J Periodontol* 1998; 69: 1291–1298.
22. Marsh PD. Dental plaque: biological significance of a biofilm and community lifestyle. *J Clin Periodontol* 2005; 32(Suppl 6): 7–15.
23. Matarazzo F, Figueiredo LC, Cruz SEB, Faveri M, Feres M. Clinical and microbiological benefits of systemic metronidazole and amoxicillin in the



treatment of smokers with chronic periodontitis: a randomized placebo-controlled study. *J Clin Periodontol*: 35: 885-896.

24. Mestnik MJ, Feres M, Figueredo LC, Duarte PM, Lira EAG, Faveri M. Short-term benefits of the adjunctive use of metronidazole plus amoxicillin in the microbial profile and in clinical parameters of subjects with generalized aggressive periodontitis. *J Clin periodontol* 2010; 37: 353-365.
25. Mombelli A, Grueter R, Gobbi C, Lang NP. Actinobacillus actinomycetemcomitans in adult periodontitis. I. Topographic distribution before and after treatment. *J Periodontol* 1994; 65: 820-826.
26. Mombelli A, Schmid B, Rutar A, Lang NP. Persistence patterns of Porphyromonas gingivalis, Prevotellaintermedia/nigrescens, and Actinobacillus actinomycetemcomitans after mechanical therapy of periodontal disease. *J Periodontol* 2000; 71: 14-21.
27. Mombelli, A. Antimicrobial profiles of periodontal pathogens and systemic antimicrobial therapy. *Journal of Clinical Periodontology* 2005; 32, 891-892.
28. O'Leary, T.J., Drake, R.B., Naylor, J.E. The plaque control record. *J Periodontol* 1972; 43, 38.
29. Oliveira APL, Faveri M, Gursky L, Mestnik MJ, Feres M, Haffajee AD, Socrasky SS, Teles RP. Effects of periodontal therapy on GCF cytokines in generalized aggressive periodontitis. *J Clin Periodontol* ahead of print. doi: 10.1111/j.1600-051X.2011.01817.x.
30. Renvert S, Wikström M, Dahlgren G, Slots J, Egelberg J. Effect of root debridement on the elimination of Actinobacillus actinomycetemcomitans and Bacteroides gingivalis from periodontal pockets. *J Clin Periodontol* 1990; 17: 345-350.
31. Rooney J, Wade WG, Sprague SV, Newcombe RG, Addy M. Adjunctive effects to non-surgical therapy of systemic metronidazole and amoxicillin alone and combined. A placebo controlled study. *J Clin Periodontol* 2002; 29: 342-350.
32. Rosalem, W., Rescala, B., Teles, R. P., Fischer, R. G., Gustafsson, A. & Figueredo, C. Effect of non-surgical treatment on chronic and aggressive periodontitis: clinical, immunological and microbiological findings. *Journal of Periodontology* 2011; 82, 979-989.
33. Ribeiro Del Peloso E, Bittencourt S, Zanin IC, BoviAmbrosano GM, Sallum EA, Nociti FH, Goncalves RB, Casati MZ. Full-mouth ultrasonic debridement

associated with amoxicillin and metronidazole in the treatment of severe chronic periodontitis. *J Periodontol* 2009; 80: 1254–1264.

34. Rodrigues AS, Lourencao DS, Neto LGL, Pannuti CM, Hirata RDC, Hirata MH, Lotufo RFM, Micheli G. Clinical and microbiological evaluation, by real-time PCR, of non-surgical treatment of aggressive periodontitis associated with amoxicillin and metronidazole. *J Periodontol* 2011, epub ahead of print DOI: 10.1902/jop.2011.110333.
35. Silva MP, Feres M, Siroto TAO, Soares GMS, Mendes JAV, Faveri M, Figueiredo LC. Clinical and microbiological benefits of metronidazole alone or with amoxicillin as adjuncts in the treatment of chronic periodontitis: a randomized placebo-controlled clinical trial. *J Clin Periodontol* 2011; 38: 828-837.
36. Slots J, Greenwell H, Fiorellini J, Giannobile W, Offenbacher S, Salkin L. Systemic antibiotics in periodontics. *J Periodontol* 2004; 75: 1553–1565.
37. van der Weijden GA, Timmerman FA. A systematic review on the clinical efficacy of subgingival debridement in the treatment of chronic periodontitis. *J Clin Periodontol* 2002; 29(Suppl. 3): 55–71.
38. van Winkelhoff AJ, Abbas F, Pavicic MJAMP, de Graaff J. Chronic conjunctivitis caused by oral anaerobes and effectively treated with systemic metronidazole plus amoxicillin. *J Clin Microbiol* 1991; 29: 723–725.
39. Varela VM, Heller D, Silva-Senem MX, Torres MCMB; Colombo APVC, Feres-Filho EJ. Systemic antimicrobials adjunctive to a repeated mechanical and antiseptic therapy for aggressive periodontitis: a 6-month randomized controlled trial. *J Periodontol* 2011; 82: 1121-1130.
40. Winkel EG, van Winkelhoff AJ, Timmerman MF, van der Velden U, Van der Weijden GA. Amoxicillin plus metronidazole in the treatment of adult periodontitis patients. A double-blind placebo-controlled study. *J Clin Periodontol* 2001; 28: 296–305.
41. Yek EC, Cintan S, Topcuoglu N, Kulekci G, Issever H, Kantarci A. Efficacy of amoxicillin and metronidazole combination for the management of generalized aggressive periodontitis. *J Periodontol* 2010; 81: 964-974.
